# Supplementary figures and images for: In vitro evaluation of critical ultrafiltration fluxes and transmembrane pressure in a high flux dialyzer
Source: Research Square preprint supplement (doi:10.21203/rs.3.rs-6271588/v1), 2025-04-24

|  |  |  |
| --- | --- | --- |
| 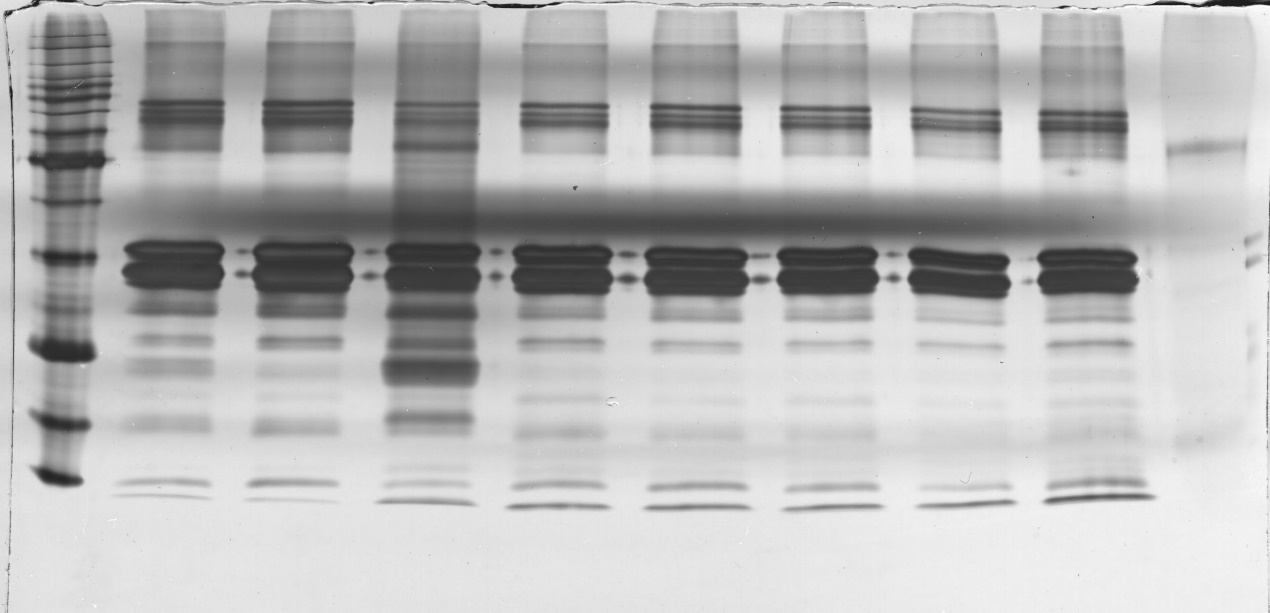  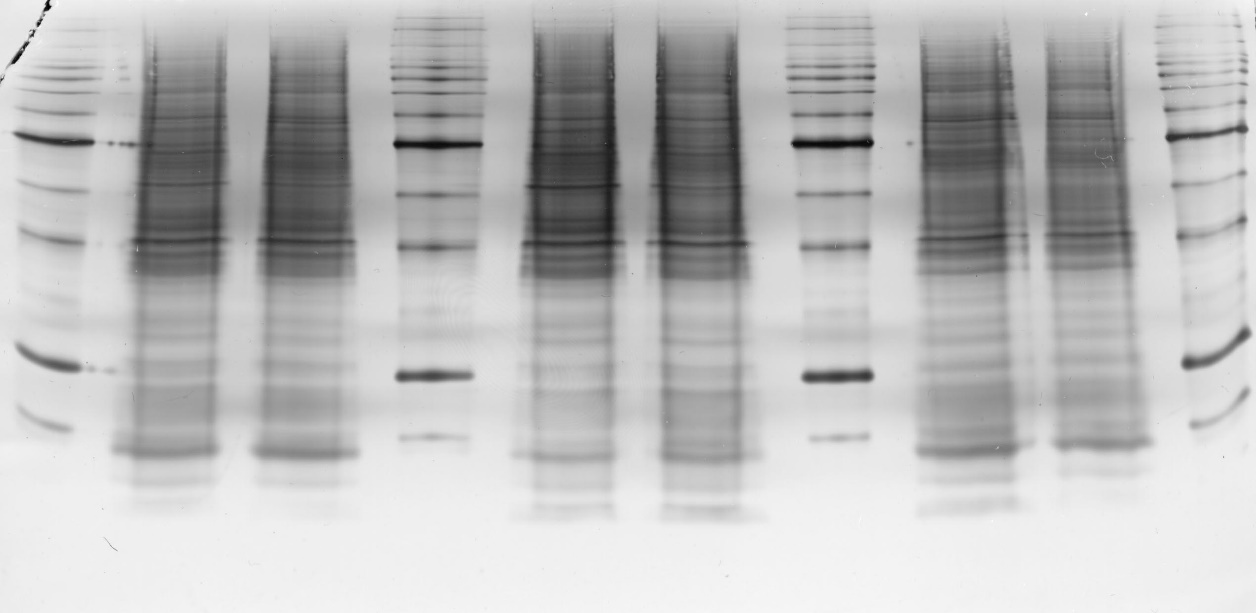 | | |

Supplement: Supplementary file 1 [file 9a8cd5450c60f4617a1d0d54.docx]
